# Supplementary material for: Occurrence, environmental implications and risk assessment of Bisphenol A in association with colloidal particles in an urban tropical river in Malaysia
Source: PubMed Central journal article supplement (PMC7683680; doi:10.1038/s41598-020-77454-8), 2020-11-23
Supplement: 41598_2020_77454_MOESM1_ESM.pdf [file 41598_2020_77454_MOESM1_ESM.pdf]

**Occurrence, environmental implications and risk assessment of Bisphenol  
A in association with colloidal particles in an urban tropical river in  
Malaysia**

Zakariya Nafi<sup>1</sup> Shehab<sup>a</sup>, Nor Rohaizah Jamil<sup>a,\*</sup>, Ahmad Zaharin Aris<sup>a</sup>

Table S1. Water Quality Parameters at 20 sampling sites along Bentong River

| Parameter/station                         | Unit      | 1       | 2       | 3       | 4       |
|-------------------------------------------|-----------|---------|---------|---------|---------|
| pH (In-Situ)                              | -         | 6.69    | 6.6     | 6.58    | 6.39    |
| Temperature (in-Situ)                     | °C        | 27.3    | 29.2    | 26.3    | 24.4    |
| Dissolved Oxygen (In-Situ)                | mg/l      | 3.75    | 3.47    | 4.53    | 4.74    |
| *Salinity (In-Situ)                       | ppt       | 0.02    | 0.02    | 0.02    | 0.01    |
| Conductivity (In-Situ)                    | p.s/cm    | 42.9    | 55.3    | 54.6    | 38      |
| Turbidity                                 | NTU       | 9.35    | 12.13   | 8.35    | 4.36    |
| Chemical Oxygen Demand                    | mg/l      | 71      | 63      | 42      | 58      |
| Biochemical Oxygen Demand @ 20°C,5 days** | mg/l      | 10      | 6       | 7       | 4       |
| Total Suspended Solids                    | mg/l      | 30      | 20      | 20      | 10      |
| Ammoniacal Nitrogen                       | mg/l      | 1.12    | 0.56    | 0.28    | 0.42    |
| *Nitrate                                  | mg/l      | ND<0.01 | ND<0.01 | ND<0.01 | 0.03    |
| Sulphate                                  | mg/l      | 8.28    | 13.73   | 15.05   | 6.48    |
| Total Coliform                            | CFU/100ml | 27000   | 22000   | 26000   | 30000   |
| Total Dissolve Solid (In-Situ)            | g/l       | 3430    | 50.86   | 137.1   | 46.52   |
| Oil & Grease                              | mg/l      | ND<1.0  | ND<1.0  | ND<1.0  | ND<1.0  |
| Phosphate                                 | mg/l      | 1.14    | ND<0.10 | 0.21    | 0.42    |
| E-Coli                                    | CFU/100ml | 3100    | 7200    | 6900    | 1400    |
| Parameter/station                         | Unit      | 5       | 6       | 7       | 8       |
| pH (In-Situ)                              | -         | 6.62    | 6.51    | 6.48    | 6.59    |
| Temperature (in-Situ)                     | °C        | 26.3    | 25.8    | 25.9    | 26.5    |
| Dissolved Oxygen (In-Situ)                | mg/l      | 5.45    | 5.7     | 5.4     | 5.84    |
| *Salinity (In-Situ)                       | ppt       | 0.03    | 0.02    | 0.02    | 0.02    |
| Conductivity (In-Situ)                    | p.s/cm    | 72.1    | 47.8    | 48.6    | 52.9    |
| Turbidity                                 | NTU       | 7.05    | 5.76    | 7.47    | 15.19   |
| Chemical Oxygen Demand                    | mg/l      | 79      | 63      | 54      | 42      |
| Biochemical Oxygen Demand @ 20°C,5 days** | mg/l      | 7       | 2       | 3       | 4       |
| Total Suspended Solids                    | mg/l      | 88      | 12      | 24      | 96      |
| Ammoniacal Nitrogen                       | mg/l      | 0.28    | 0.28    | 0.14    | 0.28    |
| *Nitrate                                  | mg/l      | 0.04    | ND<0.01 | ND<0.01 | ND<0.01 |

|                                           |             |             |           |           |           |
|-------------------------------------------|-------------|-------------|-----------|-----------|-----------|
| Sulphate                                  | mg/l        | 13.98       | 24.93     | 6.06      | 5.15      |
| Total Coliform                            | CFU/100ml   | 6300        | 32000     | 23000     | 6900      |
| Total Dissolve Solid (In-Situ)            | g/l         | 796.5       | 841.8     | 43.27     | 36.74     |
| Oil & Grease                              | mg/l        | 1           | ND<1.0    | ND<1.0    | ND<1.0    |
| Phosphate                                 | mg/l        | 0.55        | 1.54      | 0.64      | ND<0.10   |
| E-Coli                                    | CFU/100ml   | 1700        | 7100      | 6400      | 3000      |
| <b>Parameter/station</b>                  | <b>Unit</b> | <b>9</b>    | <b>10</b> | <b>11</b> | <b>12</b> |
| pH (In-Situ)                              | -           | 6.54        | 6.6       | 6.54      | 6.53      |
| Temperature (in-Situ)                     | °C          | 25.3        | 28        | 25.9      | 27.5      |
| Dissolved Oxygen (In-Situ)                | mg/l        | 5.94        | 3.39      | 4.84      | 3.35      |
| *Salinity (In-Situ)                       | ppt         | 0.02        | 0.03      | 0.03      | 0.02      |
| Conductivity (In-Situ)                    | p.s/cm      | 45.5        | 72.7      | 78.1      | 56.9      |
| Turbidity                                 | NTU         | 10.49       | 9.47      | 9.91      | 25..96    |
| Chemical Oxygen Demand                    | mg/l        | 92          | 79        | 63        | 71        |
| Biochemical Oxygen Demand @ 20°C,5 days** | mg/l        | 7           | 7         | 2         | 7         |
| Total Suspended Solids                    | mg/l        | 42          | 48        | 48        | 52        |
| Ammoniacal Nitrogen                       | mg/l        | 0.14        | 0.56      | 1.12      | 0.84      |
| *Nitrate                                  | mg/l        | 0.01        | 0.154     | 0.09      | 0.89      |
| Sulphate                                  | mg/l        | 3.09        | 16.55     | 2.58      | 32.49     |
| Total Coliform                            | CFU/100ml   | 34000       | 32000     | 30000     | 28000     |
| Total Dissolve Solid (In-Situ)            | g/l         | 73.74       | 45.59     | 83.29     | 31.63     |
| Oil & Grease                              | mg/l        | ND<1.0      | ND<1.0    | ND<1.0    | ND<1.0    |
| Phosphate                                 | mg/l        | ND<0.1<br>0 | 0.81      | 0.09      | ND<0.10   |
| E-Coli                                    | CFU/100ml   | 5900        | 2500      | 5800      | 2000      |
| <b>Parameter/station</b>                  | <b>Unit</b> | <b>13</b>   | <b>14</b> | <b>15</b> | <b>16</b> |
| pH (In-Situ)                              | -           | 6.36        | 6.25      | 6.42      | 6.6       |
| Temperature (in-Situ)                     | °C          | 26          | 24.5      | 25.9      | 28.2      |
| Dissolved Oxygen (In-Situ)                | mg/l        | 4.91        | 5.37      | 4.98      | 3.75      |
| *Salinity (In-Situ)                       | ppt         | 0.01        | 0.01      | 0.01      | 0.03      |
| Conductivity (In-Situ)                    | p.s/cm      | 28.5        | 24.6      | 28.21     | 67        |
| Turbidity                                 | NTU         | 4.52        | 2.99      | 10.74     | 82.05     |
| Chemical Oxygen Demand                    | mg/l        | 40          | 20        | 80        | 64        |
| Biochemical Oxygen Demand @ 20°C,5 days** | mg/l        | 6           | 6         | 4         | 7         |
| Total Suspended Solids                    | mg/l        | 20          | 14        | 40        | 96        |
| Ammoniacal Nitrogen                       | mg/l        | 0.56        | 0.28      | 1.12      | 1.96      |
| *Nitrate                                  | mg/l        | 0.08        | 0.09      | ND<0.01   | ND<0.01   |
| Sulphate                                  | mg/l        | 0.973       | 12.01     | 37.62     | ND<1.0    |
| Total Coliform                            | CFU/100ml   | 8000        | 7300      | 8700      | 8100      |
| Total Dissolve Solid (In-Situ)            | g/l         | 31.13       | 13.54     | 213.5     | 36.21     |
| Oil & Grease                              | mg/l        | ND<1.0      | ND<1.0    | ND<1.0    | ND<1.0    |
| Phosphate                                 | mg/l        | ND<0.10     | 0.39      | ND<0.10   | ND<0.10   |

|                                              |           |         |         |         |         |
|----------------------------------------------|-----------|---------|---------|---------|---------|
| E-Coli                                       | CFU/100ml | 1600    | 2000    | 2500    | 2200    |
| Parameter/station                            | Unit      | 17      | 18      | 19      | 20      |
| pH (In-Situ)                                 | -         | 6.69    | 6.71    | 6.68    | 6.65    |
| Temperature (in-Situ)                        | °C        | 29.3    | 28.8    | 28      | 28.5    |
| Dissolved Oxygen (In-Situ)                   | mg/l      | 3.64    | 3.53    | 3.23    | 3.44    |
| *Salinity (In-Situ)                          | ppt       | 0.03    | 0.04    | 0.04    | 0.04    |
| Conductivity (In-Situ)                       | p.s/cm    | 71.6    | 87.26   | 88.6    | 88.4    |
| Turbidity                                    | NTU       | 42.47   | 42.45   | 36.4    | 32.82   |
| Chemical Oxygen Demand                       | mg/l      | 40      | 72      | 48      | 56      |
| Biochemical Oxygen Demand<br>@ 20°C,5 days** | mg/l      | 4       | 7       | 7       | 4       |
| Total Suspended Solids                       | mg/l      | 92      | 76      | 72      | 52      |
| Ammoniacal Nitrogen                          | mg/l      | 0.28    | 1.26    | 1.68    | 0.56    |
| *Nitrate                                     | mg/l      | ND<0.01 | ND<0.01 | ND<0.01 | ND<0.01 |
| Sulphate                                     | mg/l      | 25.24   | 13.64   | 6.76    | 22.25   |
| Total Coliform                               | CFU/100ml | 18000   | 11000   | 24000   | 19000   |
| Total Dissolve Solid (In-Situ)               | g/l       | 42.1    | 54.46   | 43      | 71.68   |
| Oil & Grease                                 | mg/l      | ND<1.0  | ND<1.0  | ND<1.0  | ND<1.0  |
| Phosphate                                    | mg/l      | ND<0.10 | 0.22    | 0.29    | ND<0.10 |
| E-Coli                                       | CFU/100ml | 1900    | 3500    | 7600    | 5600    |

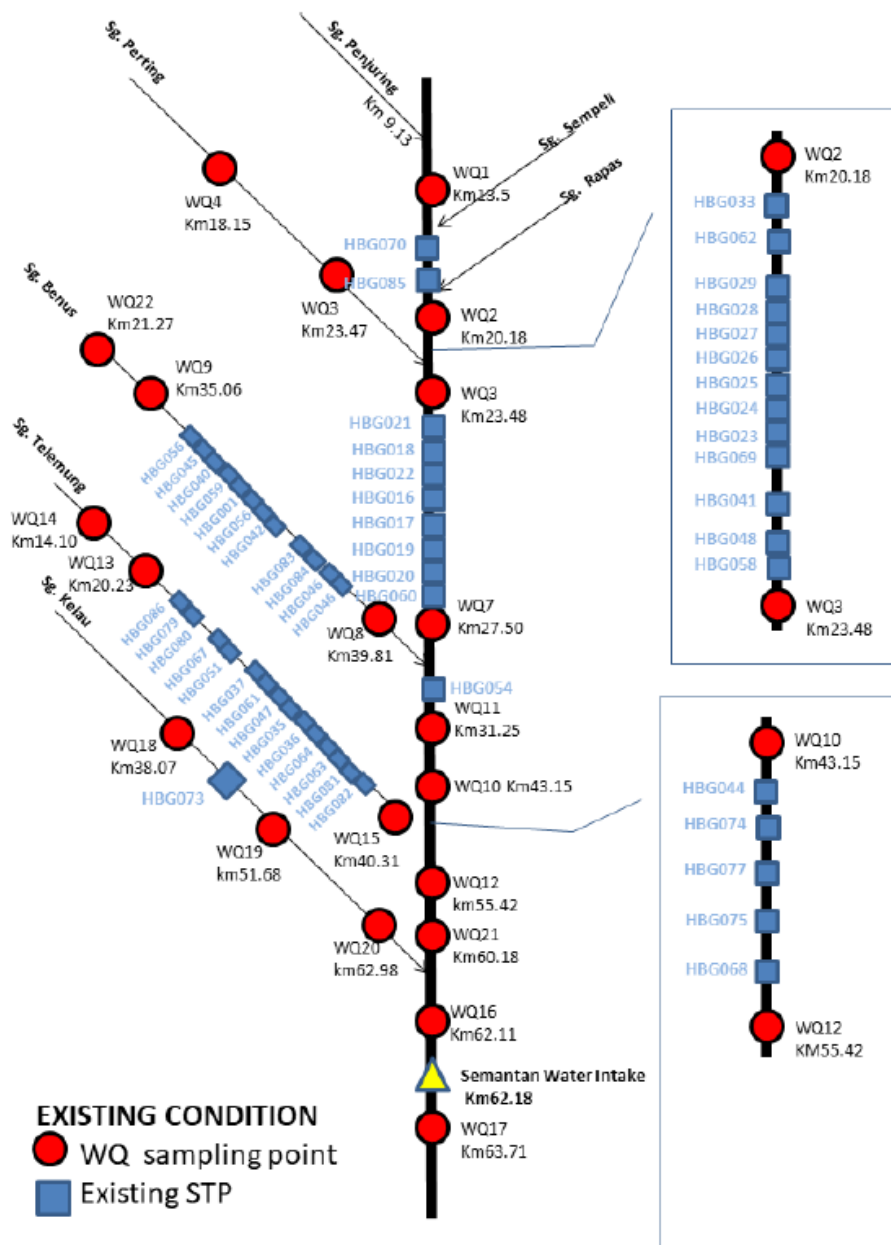

Figure S1. Schematic diagram of Bentong River
